## Correction

# Correction: Can We Disrupt the Sensing of Honey Bees by the Bee Parasite *Varroa destructor*?

The *PLOS ONE* Staff

An affiliation for the first author is missing. Nurit Eliash is also affiliated with: Institute of Agroecology and Plant Health, Robert H. Smith Faculty of Agriculture, Food and Environment, Hebrew University of Jerusalem, Rehovot, Israel

## Reference

1. Eliash N, Singh NK, Kamer Y, Pinnelli GR, Plettner E, et al. (2014) Can We Disrupt the Sensing of Honey Bees by the Bee Parasite *Varroa destructor*? PLoS ONE 9(9): e106889. doi:10.1371/journal.pone.0106889

**Citation:** The *PLOS ONE* Staff (2014) Correction: Can We Disrupt the Sensing of Honey Bees by the Bee Parasite *Varroa destructor*? PLoS ONE 9(12): e116127. doi:10.1371/journal.pone.0116127

**Published:** December 19, 2014

**Copyright:** © 2014 The *PLOS ONE* Staff. This is an open-access article distributed under the terms of the Creative Commons Attribution License, which permits unrestricted use, distribution, and reproduction in any medium, provided the original author and source are credited.
